# Supplementary material for: The role of obesity in exceptionally slow US mortality improvement
Source: PubMed Central journal article supplement — Proc Natl Acad Sci U S A. 2018 Jan 16;115(5):957–61. doi: 10.1073/pnas.1716802115 (PMC5798364; doi:10.1073/pnas.1716802115), 2018-01-16
Supplement: pnas.201716802SI.pdf [file pnas.201716802SI.pdf]

# Supporting Information

Preston et al. 10.1073/pnas.1716802115

**Table S1. Cox hazards of dying during follow-up in NHANES, 1988–2011: Models 1–6**

| Characteristic                           | Age + Sex [SE]   |                  | Age + Sex + Race [SE] |                  | Age + Sex + Race + Smoking[SE] |                  |
|------------------------------------------|------------------|------------------|-----------------------|------------------|--------------------------------|------------------|
|                                          | Model 1          | Model 2          | Model 3               | Model 4          | Model 5                        | Model 6          |
| Calendar year                            | −0.0181 [0.0046] | −0.0235 [0.0044] | −0.0183 [0.0044]      | −0.0235 [0.0043] | −0.0137 [0.0042]               | −0.0192 [0.0040] |
| Age at baseline                          | 0.0869 [0.0025]  | 0.0878 [0.0025]  | 0.0876 [0.0024]       | 0.0883 [0.0025]  | 0.0947 [0.0028]                | 0.0964 [0.0029]  |
| Sex (ref: female)                        | 0.3898 [0.0321]  | 0.4070 [0.0321]  | 0.3994 [0.0322]       | 0.4186 [0.0322]  | 0.2907 [0.0340]                | 0.3144 [0.0352]  |
| Race/ethnicity (ref: Non-Hispanic White) |                  |                  |                       |                  |                                |                  |
| Non-Hispanic Black                       | —                | —                | 0.4720 [0.0430]       | 0.3803 [0.0453]  | 0.4175 [0.0442]                | 0.3215 [0.0457]  |
| Hispanic                                 | —                | —                | −0.0173 [0.0695]      | −0.0280 [0.0674] | −0.0007 [0.0719]               | −0.0119 [0.0690] |
| Other                                    | —                | —                | 0.0236 [0.1526]       | 0.1148 [0.1502]  | 0.0856 [0.1450]                | 0.1623 [0.1495]  |
| Smoking status (ref: never)              |                  |                  |                       |                  |                                |                  |
| Former                                   | —                | —                | —                     | —                | 0.3846 [0.0489]                | 0.3711 [0.0481]  |
| Current                                  | —                | —                | —                     | —                | 1.0480 [0.0547]                | 1.0975 [0.0550]  |
| Max BMI above 25                         | —                | —                | —                     | 0.0412 [0.0035]  | —                              | 0.0455 [0.0035]  |

All results reflect sample weighting.

**Table S2. Cox hazards of dying during follow-up in NHANES, 1988–2011: Models 7–10**

| Characteristic                           | Age + Sex + Race + Education [SE] |                  | Full model [SE]  |                  |
|------------------------------------------|-----------------------------------|------------------|------------------|------------------|
|                                          | Model 7                           | Model 8          | Model 9          | Model 10         |
| Calendar year                            | −0.0118 [0.0043]                  | −0.0170 [0.0042] | −0.0090 [0.0041] | −0.0147 [0.0040] |
| Age at baseline                          | 0.0826 [0.0025]                   | 0.0838 [0.0026]  | 0.0903 [0.0029]  | 0.0926 [0.0030]  |
| Sex (ref: female)                        | 0.4352 [0.0335]                   | 0.4490 [0.0335]  | 0.3149 [0.0362]  | 0.3326 [0.0372]  |
| Race/ethnicity (ref: Non-Hispanic White) |                                   |                  |                  |                  |
| Non-Hispanic Black                       | 0.3439 [0.0405]                   | 0.2806 [0.0426]  | 0.3218 [0.0411]  | 0.2494 [0.0427]  |
| Hispanic                                 | −0.2213 [0.0656]                  | −0.2048 [0.0634] | −0.1658 [0.0689] | −0.1500 [0.0658] |
| Other                                    | 0.0026 [0.1378]                   | 0.0846 [0.1380]  | 0.0621 [0.1373]  | 0.1366 [0.1427]  |
| Education (ref: high school)             |                                   |                  |                  |                  |
| Less than ninth grade                    | 0.2963 [0.0495]                   | 0.2641 [0.0515]  | 0.2747 [0.0467]  | 0.2432 [0.0466]  |
| Less than high school                    | 0.1805 [0.0548]                   | 0.1519 [0.0538]  | 0.1293 [0.0533]  | 0.1008 [0.0525]  |
| Some college/AA degree                   | −0.0907 [0.0468]                  | −0.0765 [0.0468] | −0.0613 [0.0460] | −0.0383 [0.0466] |
| Bachelor's or more                       | −0.5633 [0.0705]                  | −0.5110 [0.0711] | −0.4345 [0.0727] | −0.3694 [0.0739] |
| Smoking status (ref: never)              |                                   |                  |                  |                  |
| Former                                   | —                                 | —                | 0.3714 [0.0467]  | 0.3610 [0.0469]  |
| Current                                  | —                                 | —                | 0.9742 [0.0573]  | 1.0364 [0.0574]  |
| Max BMI above 25                         | —                                 | 0.0368 [0.0036]  | —                | 0.0425 [0.0036]  |

All results reflect sample weighting.

**Table S3. Cox hazards of dying during follow-up in NHANES, 1988–2011: Models 11–12**

| Characteristic                           | BMI × year [SE]  | BMI × Smoke [SE] |
|------------------------------------------|------------------|------------------|
|                                          | Model 11         | Model 12         |
| Calendar year                            | −0.0194 [0.0055] | −0.0147 [0.0040] |
| Age at baseline                          | 0.0926 [0.0030]  | 0.0925 [0.0030]  |
| Sex (ref: female)                        | 0.3325 [0.0374]  | 0.3315 [0.0371]  |
| Race/ethnicity (ref: Non-Hispanic White) |                  |                  |
| Non-Hispanic Black                       | 0.2491 [0.0427]  | 0.2440 [0.0430]  |
| Hispanic                                 | −0.1505 [0.0658] | −0.1514 [0.0663] |
| Other                                    | 0.1363 [0.1430]  | 0.1453 [0.1431]  |
| Education (ref: high school)             |                  |                  |
| Less than ninth grade                    | 0.2463 [0.0460]  | 0.2433 [0.0466]  |
| Less than high school                    | 0.1019 [0.0525]  | 0.0987 [0.0526]  |
| Some college/AA degree                   | −0.0391 [0.0465] | −0.0404 [0.0465] |
| Bachelor's or more                       | −0.3686 [0.0740] | −0.3683 [0.0739] |
| Smoking status (ref: never)              |                  |                  |
| Former                                   | 0.3611 [0.0468]  | 0.4599 [0.0796]  |
| Current                                  | 1.0357 [0.0574]  | 1.1168 [0.0744]  |
| Max BMI above 25                         | 0.0326 [0.0080]  | 0.0508 [0.0060]  |
| Max BMI × Calendar year                  | 0.0007 [0.0005]  |                  |
| Max BMI × Smoking                        |                  |                  |
| BMI × Former                             | —                | −0.0133 [0.0074] |
| BMI × Current                            | —                | −0.0113 [0.0078] |

All results reflect sample weighting.
